# Supplementary material for: Multi-omics analysis reveals the landscape of tumor microenvironments in left-sided and right-sided colon cancer
Source: Front Med (Lausanne). 2024 Aug 29;11:1403171. doi: 10.3389/fmed.2024.1403171 (PMC11391487; doi:10.3389/fmed.2024.1403171)
Supplement: Supplementary Table 3 — Key resources information. [file Table_3.XLSX]

## Sheet: Sheet1
KEY RESOURCES TABLE
REAGENT or RESOURCE	SOURCE	IDENTIFIER
Anti-Human CD45 APC-CY7(FACS)	BioLegend	Cat#304014
Anti-Human CD4 PerCP/Cyanine5.5 (FACS)	BioLegend	Cat#300530
Anti-Human CD8 FITC (FACS)	BioLegend	Cat#301006
Anti-Human CD279(PD-1) PE (FACS)	BioLegend	Cat#379210
Ghost Dye(Aqua) Violet 510	TONBO	Cat#13-0870-T100
anti-human CD4 Alexa Fluor® 488 (IHC)	BioLegend	Cat#317419
Anti-Human CD8(IHC)	Abcam	Cat#ab17147
Anti-Human PD1(IHC)	Abcam	Cat#ab237728
Goat Anti-Mouse IgG H&L (Alexa Fluor® 647)	Abcam	Cat#ab150115
Goat Anti-Rabbit IgG H&L (Alexa Fluor® 594)	Abcam	Cat#ab150080
